# Supplementary material for: Integrated analysis reveals the dysfunction of signaling pathways in uveal melanoma
Source: PubMed Central journal article supplement (PMC9258069; doi:10.1186/s12885-022-09822-8), 2022-07-05

FigureS2

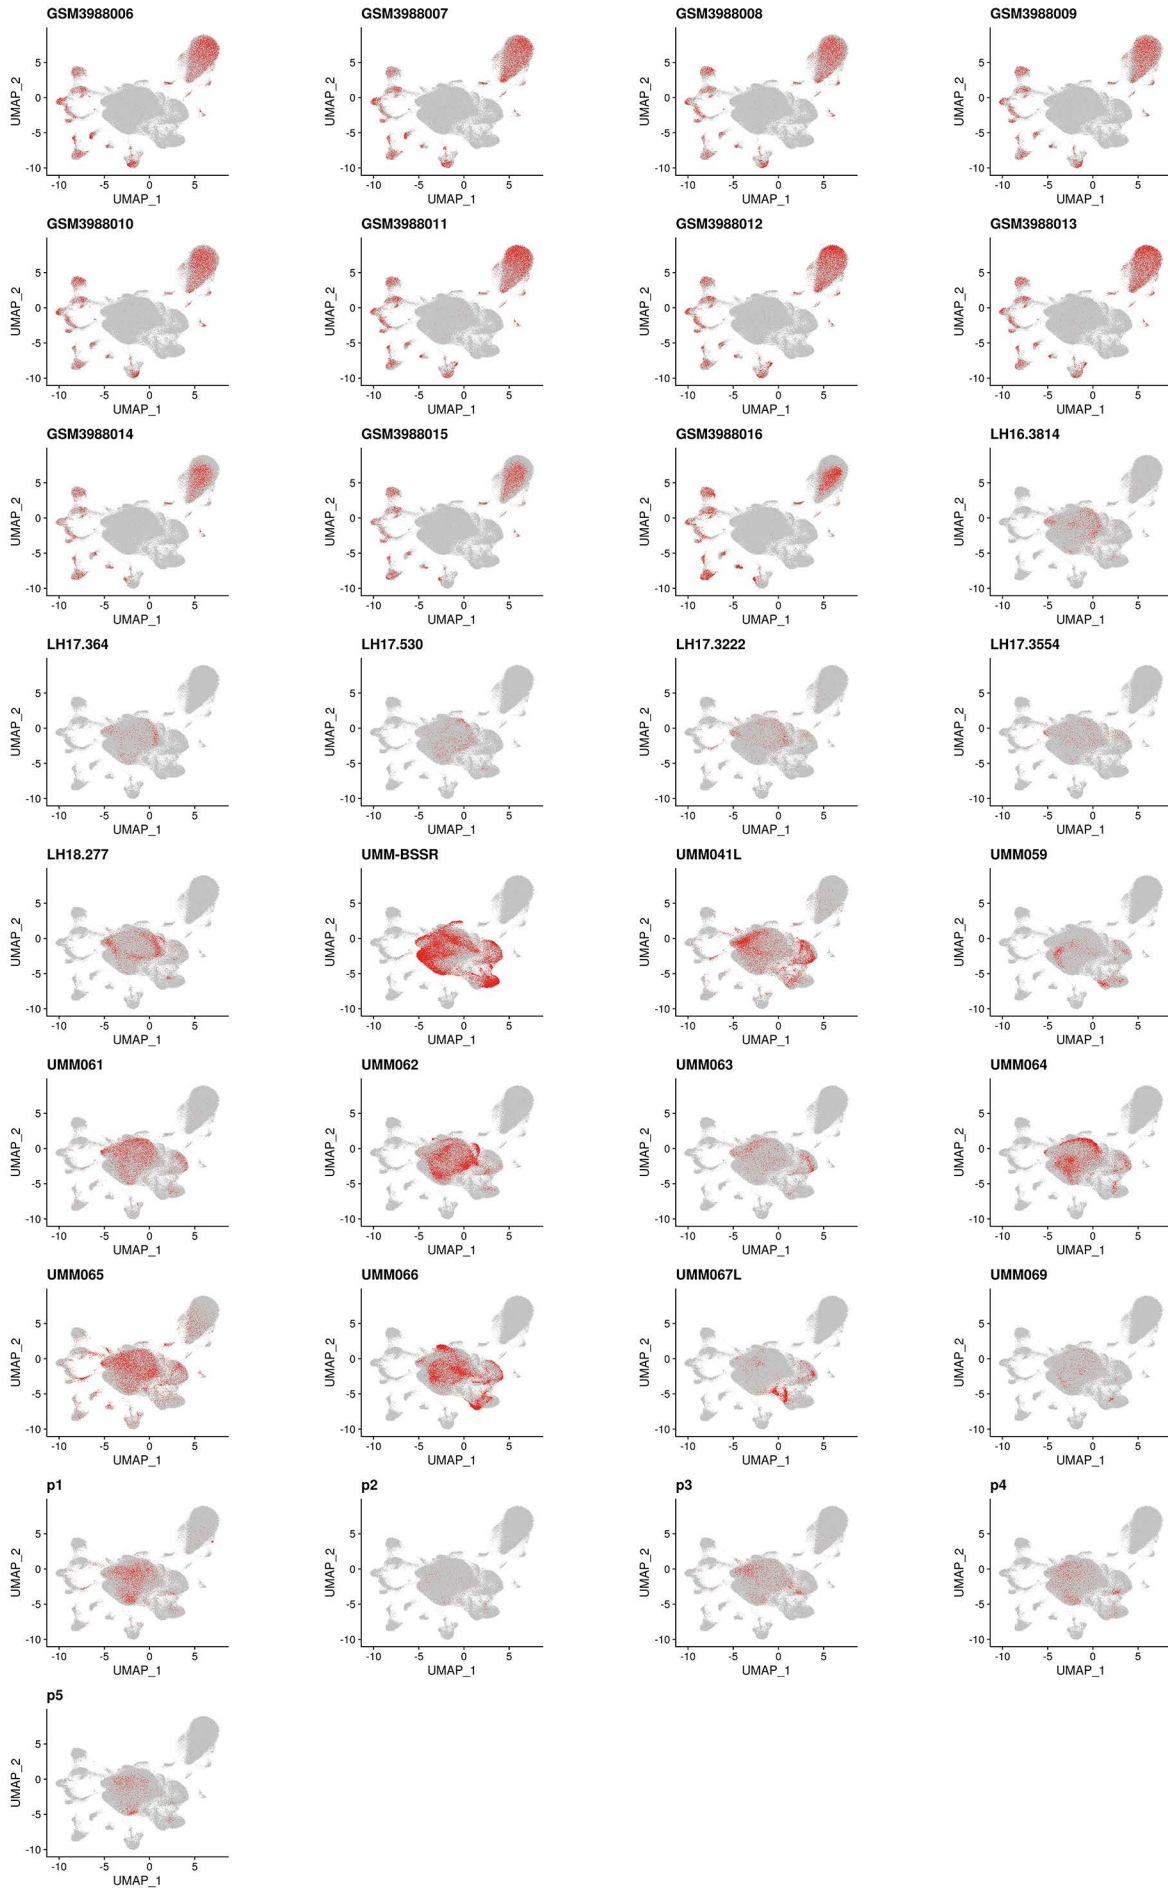

FigureS3

A

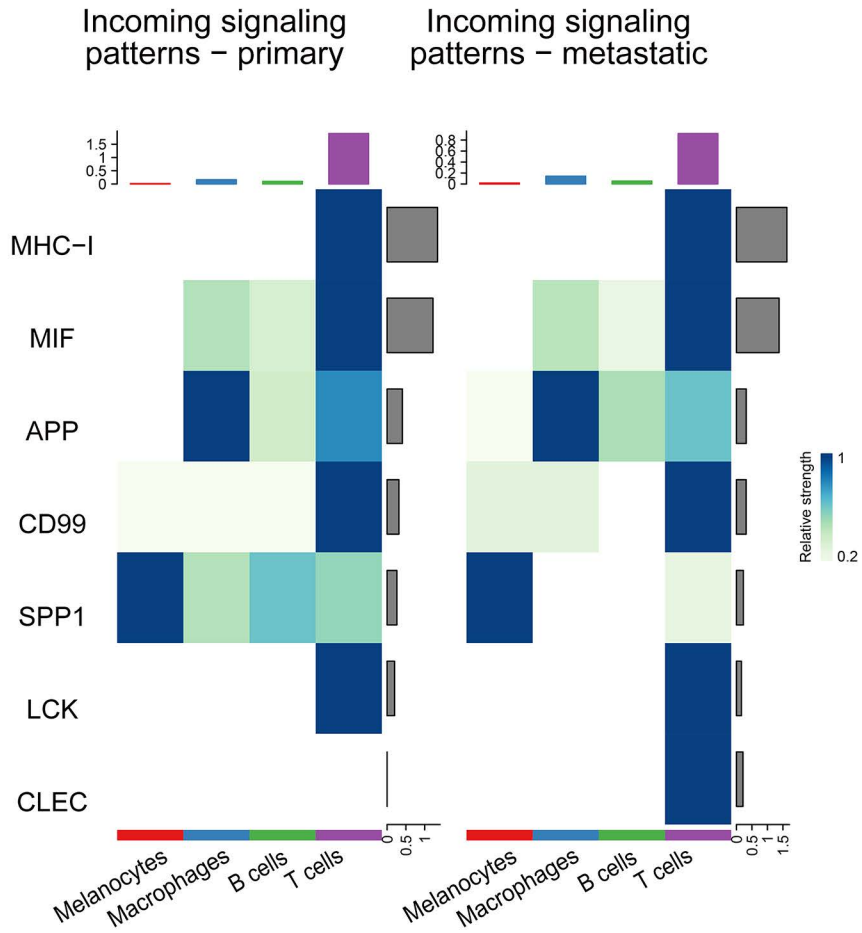

B

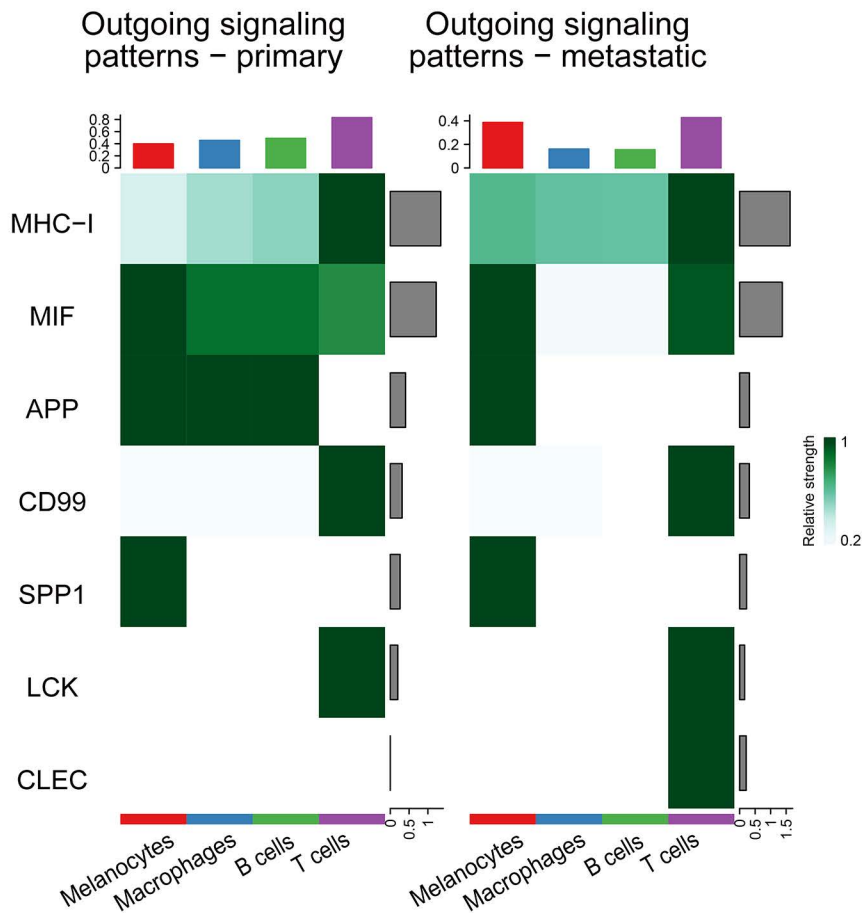

# FigureS4

A

CD99 primary signaling pathway network

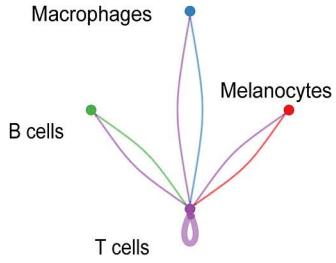

CD99 metastatic signaling pathway network

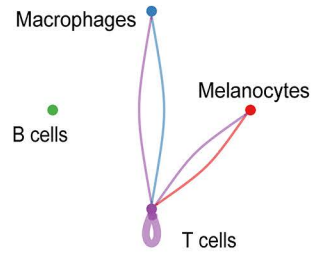

B

MIF primary signaling pathway network

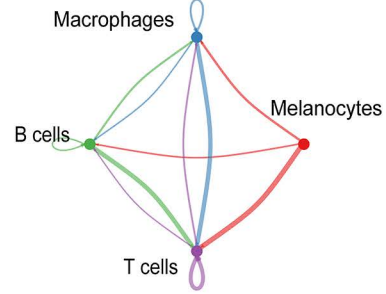

MIF metastatic signaling pathway network

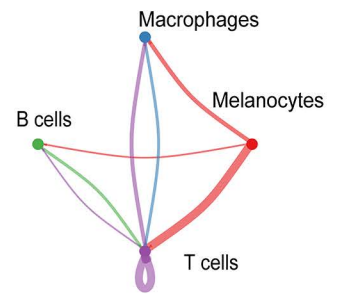

C

LCK primary signaling pathway network

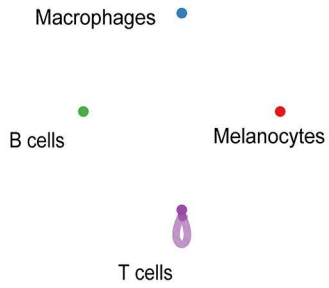

LCK metastatic signaling pathway network

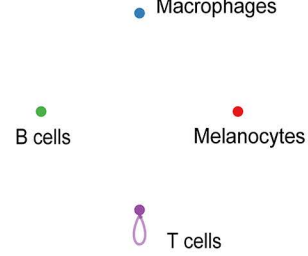

D

MHC-I primary signaling pathway network

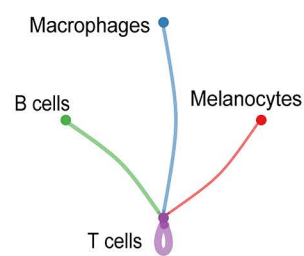

MHC-I metastatic signaling pathway network

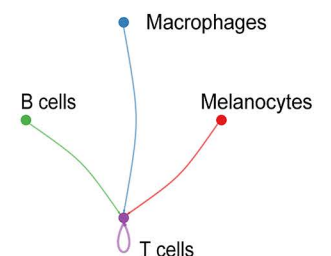

E

SPP1 primary signaling pathway network

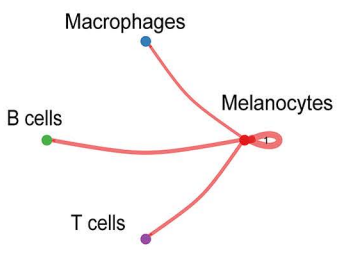

SPP1 metastatic signaling pathway network

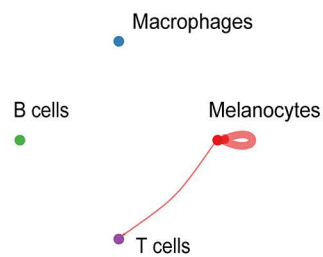

FigureS5

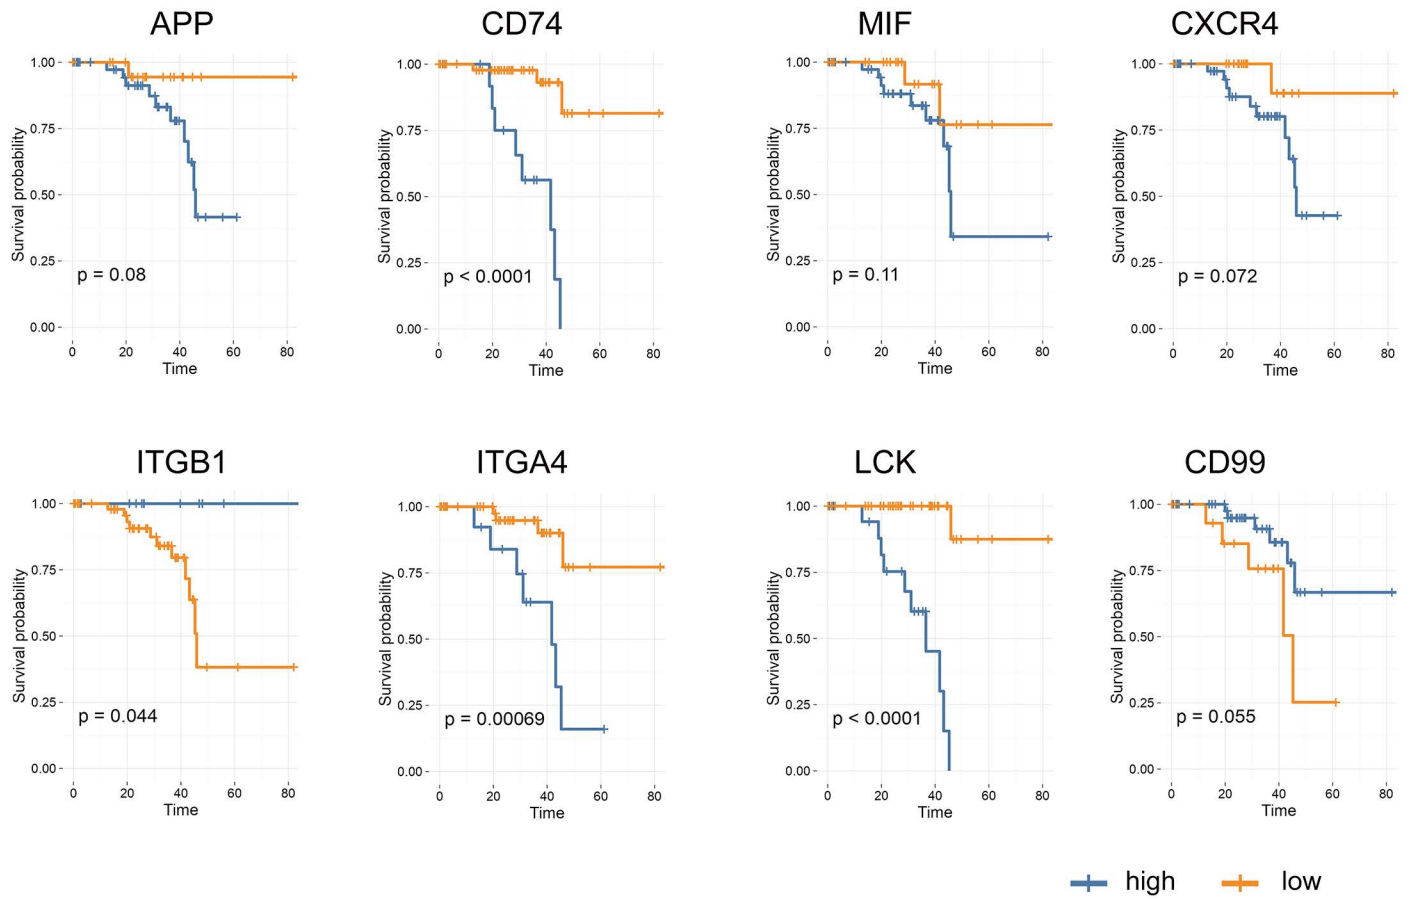

FigureS6

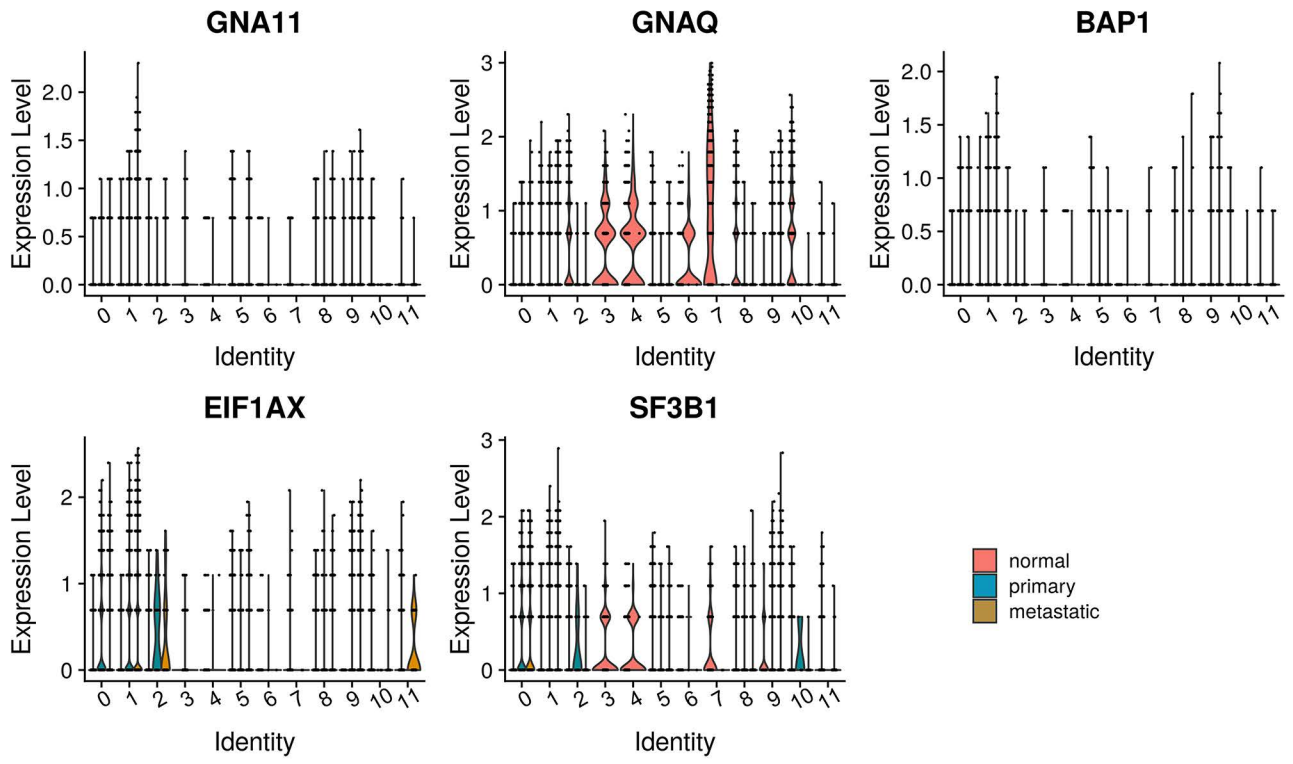

Supplement: 12885_2022_9822_MOESM7_ESM.pdf [file 12885_2022_9822_MOESM7_ESM.pdf]
